# Supplementary material
Source: publisher figshare collection journal article supplement (https://gsajournals.figshare.com/ndownloader/files/25764551)
Supplement: Supplementary file 1 [file 25764551]

## Sheet: Supplemental_Table_S1
Supplemental Table S1: BUSCO statistics on genome hybrid assembly.
1404	Complete BUSCOs (C)
425	Complete and single-copy BUSCOs (S)
979	Complete and duplicated BUSCOs (D)
8	Fragmented BUSCOs (F)
28	Missing BUSCOs (M)
1440	Total BUSCO groups searched
